# Supplementary material for: Unravelling the formation mechanism of alkynyl protected gold clusters: a case study of phenylacetylene stabilized Au144 molecules
Source: Royal Society of Chemistry journal article supplement (doi:10.1039/c9nr10930g), 2020-01-01
Supplement: c9nr10930g1.pdf [file c9nr10930g1.pdf]

## Supporting Information for

# **Unravelling the Formation Mechanism of Alkynyl Protected Gold Clusters: A Case Study of Phenylacetylene Stabilized Au<sub>144</sub> Molecules**

Xiaoshuang Ma,<sup>a</sup> Zhenghua Tang,<sup>\*a,b</sup> Lubing Qin,<sup>a</sup> Jin Peng,<sup>a</sup> Ligui Li,<sup>a</sup> and Shaowei Chen<sup>\*a,c</sup>

<sup>a</sup> Guangzhou Key Laboratory for Surface Chemistry of Energy Materials and New Energy Research Institute, School of Environment and Energy, South China University of Technology, Guangzhou Higher Education Mega Center, Guangzhou, Guangdong, 510006, P. R. China.

E-mail: [zhht@scut.edu.cn](mailto:zhht@scut.edu.cn)

<sup>b</sup> Guangdong Engineering and Technology Research Center for Surface Chemistry of Energy Materials, School of Environment and Energy, South China University of Technology, Guangzhou Higher Education Mega Centre, Guangzhou, Guangdong, 510006, P. R. China.

<sup>c</sup> Department of Chemistry and Biochemistry, University of California, 1156 High Street, Santa Cruz, California, 95064, United States.

E-mail: [shaowei@ucsc.edu](mailto:shaowei@ucsc.edu)

## Experimental section

**Physical measurements and instrumentation.** The surface chemical compositions and valence states were examined by X-ray photoelectron spectroscopy (XPS, Phi X-tool instrument). Scanning electronic microscopic (SEM) images were collected with a field-emission scanning electron microscope (FESEM, Merlin). UV-visible absorption spectra of clusters, dimer and tetramer were recorded on a Shimadzu 2600/2700 spectrophotometer. The metal-to-organic ratio of the Au clusters was determined by thermogravimetry analysis (TGA) with a METTLER instrument under a N<sub>2</sub> atmosphere. Fourier-transform infrared (FTIR) spectrum was collected from KBr pellets in the range of 4000 - 400 cm<sup>-1</sup> with a Nicolet FTIR spectrometer. GC-MS was conducted with an instrument from EWI GC-MS 3200. GC test condition: The GC used manual injection style, with inlet temperature of 280 °C. The ion source temperature was also set at 280 °C. Argon (purity 99.9995%) was used as carrier gas. The gas flow rate through the column was 1 mL·min<sup>-1</sup> and the column temperature was held at 280 °C for 30 minutes. The GSV valve was opened for 2 mins. MS test condition: Solvent delay was 4 mins, and scan range was 35-300 amu (atomic mass unit) from 4 to 30 mins.

**Electrospray ionization mass spectrometry (ESI-MS).** The ESI mass spectra were recorded using a Waters Q-TOF mass spectrometer equipped with a Z-spray source.<sup>1, 2</sup> The source temperature was kept at 70°C. The cluster sample was directly infused into the chamber at 5 µL/min. The spray voltage and the cone voltage were kept at 2.20 V and 60 V, respectively. The ESI sample was dissolved in dichloromethane (~1 mg/mL). All the mass spectra were obtained with positive ion mode. Calibration was performed using CsI clusters.

**X-ray Crystallography.** Data collection for (PA)<sub>4</sub> was carried on an Agilent Technologies SuperNova Single Crystal Diffractometer using Cu Kα radiation ( $\lambda = 1.54178 \text{ \AA}$ ) at 100 K. Absorption corrections were applied by using the program CrysAlis (multi-scan).<sup>3</sup> The structure was solved by direct methods, and non-hydrogen atoms were refined anisotropically by least-squares on  $F^2$  using the SHELXTL program. C atoms and solvent molecules were refined isotropically due to weak diffraction. The structure was solved and refined using Full-matrix least-squares based on  $F^2$  with program SHELXS-97 and SHELXL-97 within OLEX2.<sup>4</sup>

**Materials and reagents.** Acetone, ethanol, dichloromethane, Et<sub>3</sub>N and n-hexane were purchased from Caiyunfei Chemical Reagents (Tianjin, China). Hydrogen tetrachloroaurate (III) trihydrate (HAuCl<sub>4</sub>·3H<sub>2</sub>O), 2-thiapropane (Me<sub>2</sub>S) and phenylacetylene (PhC≡CH) were acquired from Energy Chemicals (Shanghai, China). Sodium borohydride (NaBH<sub>4</sub>) was obtained from Aladdin Industrial Corporation (Shanghai, China). The water was supplied by using a Barnstead Nanopure water system and had a resistivity of 18.3 MΩ cm<sup>-1</sup>. All chemicals were used as received without further purification.

**Synthesis of Me<sub>2</sub>SAuCl.** Me<sub>2</sub>SAuCl was synthesized by stirring the mixture of HAuCl<sub>4</sub>·3H<sub>2</sub>O and SMe<sub>2</sub> in ethanol according to the procedure described by Russell et al.<sup>5</sup> Briefly, Under Ar, a solution of Me<sub>2</sub>S (0.65 mL, 8.82 mmol) in anhydrous ethanol (30 mL) was added directly to HAuCl<sub>4</sub>·3H<sub>2</sub>O (1.00 g, 2.94 mmol) dissolved in anhydrous ethanol (20 mL) under vigorous stirring (1000 rpm), a white precipitate began to form. Reaction mixture was stirred at room temperature for 2 h until aqueous phase was in colorless. The solution was cooled to 0 °C for 10

min, white precipitate isolated by filtration, washing with cold ethanol ( $3 \times 10$  mL) and dry diethyl ether ( $3 \times 10$  mL). The product was a white solid without drying (yield: 95%).

Caution!  $\text{Me}_2\text{SAuCl}$  was decomposed under the room temperature. However, it could be stored for a long time only in the low temperature ( $< 8^\circ\text{C}$ ) and dry.

**Synthesis of the  $(\text{Au-PA})_f$  precursor.** Low polymeric degree of precursor  $(\text{Au-PA})_f$  was prepared according to a reported protocol with some minor modifications.<sup>6</sup> In a typical synthesis,  $\text{Me}_2\text{SAuCl}$  (120.0 mg, 0.41 mmol) and  $\text{PhC}\equiv\text{CH}$  (66.3  $\mu\text{L}$ , 0.61 mmol) was dissolved in acetone (15 mL) under the ultrasound condition at room temperature (160 W, 40 kHz). After 10 min,  $\text{Et}_3\text{N}$  (83.6  $\mu\text{L}$ , 0.61 mmol) was added with vigorous stirring (1000 rpm). Reaction mixture was stirred at room temperature for 1 h in absence of light. After reaction, the volume of the mixture was evaporated to 5 mL and 50 times excess (250 mL) ethanol was added dropwise (at intervals of 30 minutes, divided into four times, proportional 1: 2: 2: 4) with slight stirring (200 rpm) give light-yellow solid ( $\sim 80$  mg), which was successively washed with ethanol ( $2 \times 10$  mL), water ( $2 \times 10$  mL) dry diethyl ether ( $3 \times 10$  mL) to remove  $\text{PhC}\equiv\text{CH}$  and dimethyl sulfoxide.

**Synthesis of  $\text{Au}_{144}(\text{PA})_{60}$  clusters.** In a typical synthesis, precursor was directly reduced with  $\text{NaBH}_4$ . Briefly,  $(\text{Au-PA})_f$  (50.00 mg, 0.17 mmol) was dispersed in dichloromethane (20 mL) under the ultrasound condition at room temperature (160 W, 40 kHz). After 10min, a freshly  $\text{NaBH}_4$  (0.03 mmol in 1.0 mL of ethanol) was added dropwise (in 10 min) with vigorous stirring (800 rpm). The color changed from yellow to pale brown and finally to dark brown. Reaction mixture was stirred at room temperature overnight in absence of light. After 12 h, excess  $\text{PhC}\equiv\text{CH}$  (200  $\mu\text{L}$ ) and  $\text{Et}_3\text{N}$  (200  $\mu\text{L}$ ) were added to the mixture and the reaction aged for one day under the same ambient conditions. After reaction, the volume of the mixture was evaporated to 4 mL and 50 times excess (200 mL) n-hexane was added to give black solid, which was washed with excess n-hexane and collected by centrifugation. The crude products dissolved in 1 mL of  $\text{CH}_2\text{Cl}_2$  were pipetted onto ten pieces of a PTLC plate (10 cm by 20 cm), and the separation was conducted in a developing tank (solvent:  $\text{CH}_2\text{Cl}_2/\text{n-hexane}/\text{Et}_3\text{N} = 100: 20: 0.72$ , volume ratio) for  $\sim 10$  min. Then, the band of  $\text{Au}_{144}(\text{PA})_{60}$  in the PTLC plate was cut, and the nanoparticles were extracted with pure  $\text{CH}_2\text{Cl}_2$  and then dried by rotary evaporation.

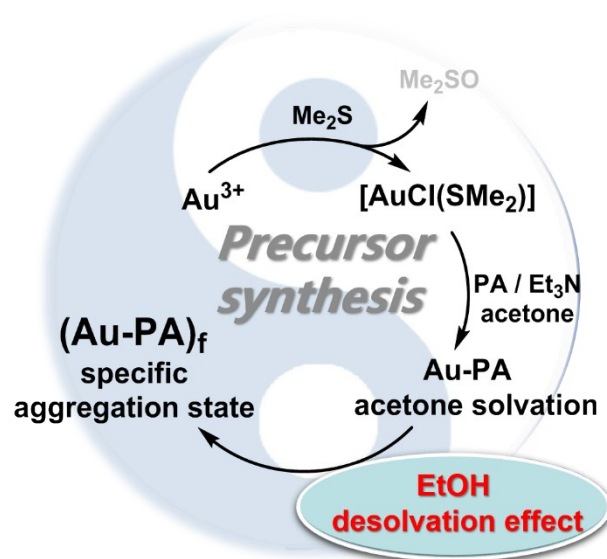

**Scheme S1.** The synthetic route for the (Au-PA)<sub>f</sub> precursor from Au<sup>3+</sup> salt.

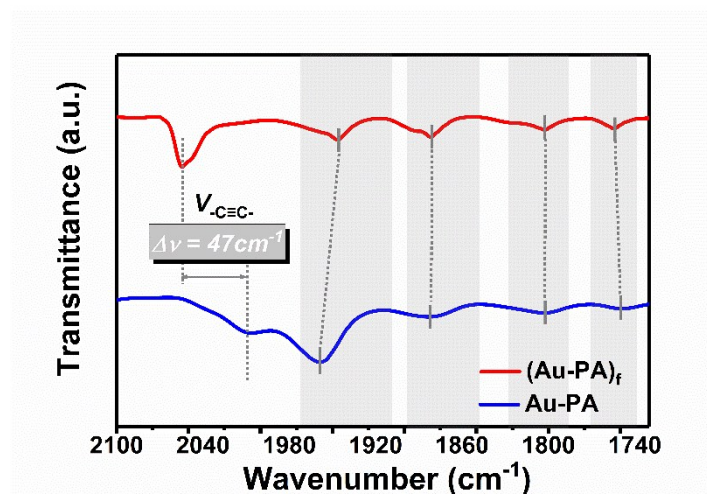

**Figure S1.** FTIR analyses of two different precursors  $(\text{Au-PA})_f$  (this work) and Au-PA (prepared according to the reported method).<sup>6</sup>

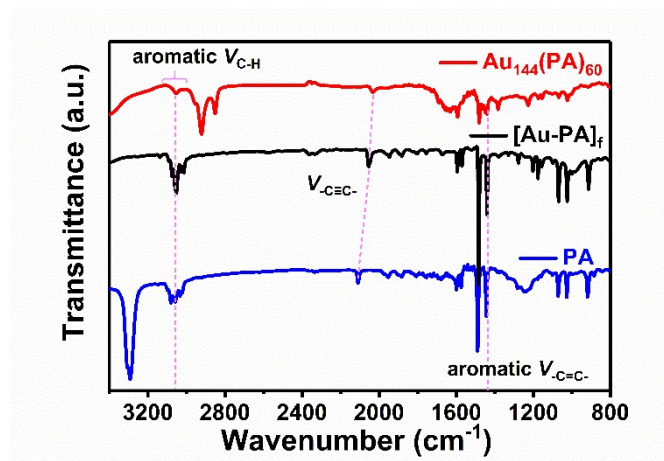

**Figure S2.** FTIR spectrum, from bottom to top: PA ligand only, the  $(\text{Au-PA})_f$  precursor and  $\text{Au}_{144}(\text{PA})_{60}$ .  $V_{\text{C-H}}$  stretching peak ( $\sim 3300 \text{ cm}^{-1}$ ) signal disappears upon the formation of the bonding between carbon and gold in precursor and clusters.

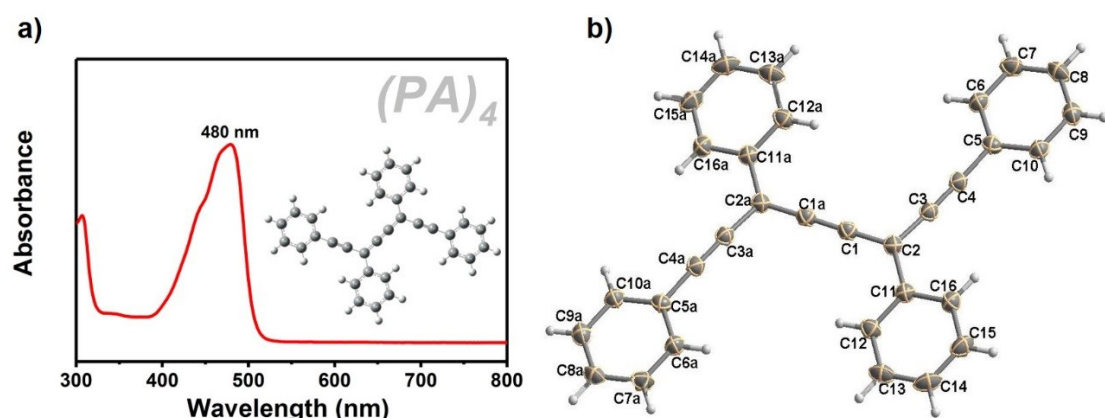

**Figure S3.** a) Absorbance spectrum of (PA)<sub>4</sub> in CH<sub>2</sub>Cl<sub>2</sub>. b) Molecular structure of the (PA)<sub>4</sub> tetramer determined by X-ray crystallography.

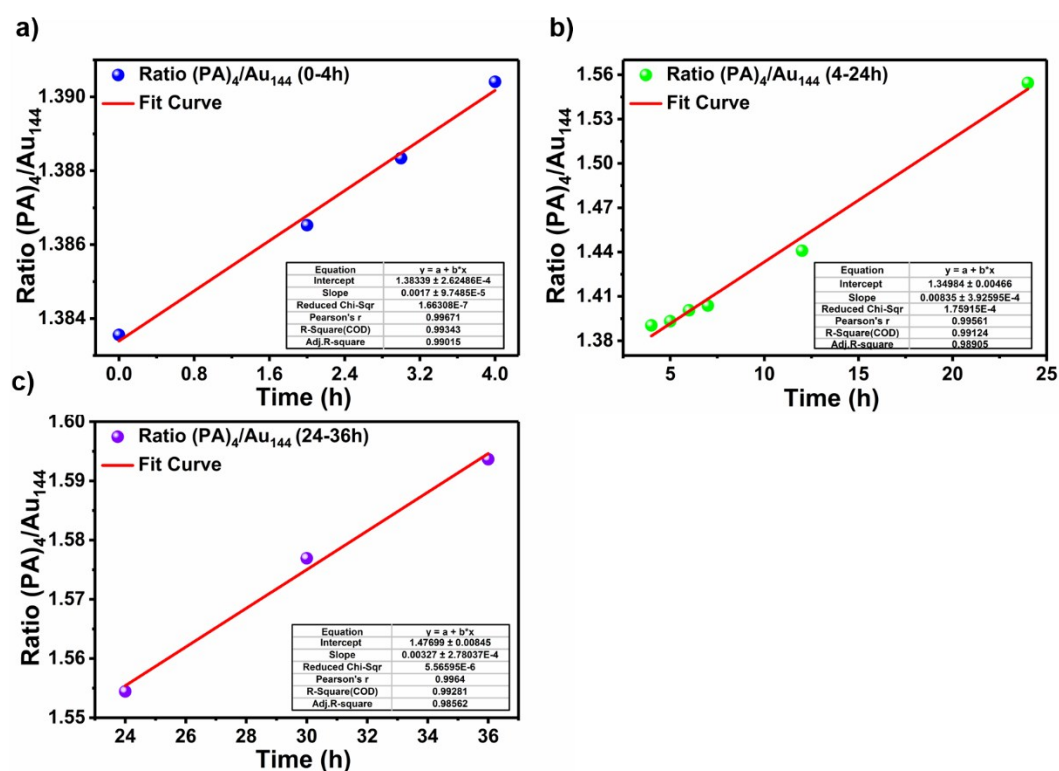

**Figure S4.** By using the absorbance value (480 nm for (PA)<sub>4</sub>, 542 nm for Au<sub>144</sub>) as the metric, the molecular ratio change of (PA)<sub>4</sub>-to-Au<sub>144</sub>(PA)<sub>60</sub> was qualitatively observed: a) In the first 4 h and its fitting curve; b) In the 4-24 h and its fitting curve and c) In the last 12 h and its fitting curve.

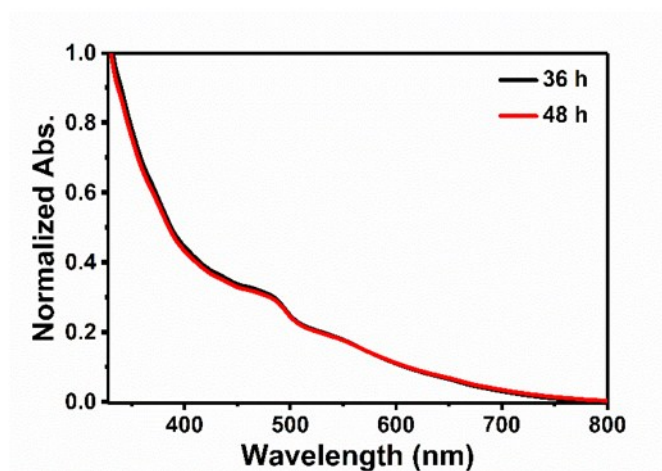

**Figure S5.** The absorbance of the reaction mixture at 36 h and 48 h. An aliquot of the reaction mixture in methylene chloride phase was diluted to the proper absorbance range for each measurement.

**Table S1.** The Au/C molar ratio in Au<sub>144</sub>(PA)<sub>60</sub> evaluated by XPS analysis.

| Samples                                                  | Au content by XPS ( <i>at. %</i> ) | C content by XPS ( <i>at. %</i> ) | Au: C ratio |
|----------------------------------------------------------|------------------------------------|-----------------------------------|-------------|
| Au <sub>144</sub> (PA) <sub>60</sub><br>(Au: C = 1: 3.3) | 19.65                              | 65.21                             | 1: 3.3      |

**Table S2.** The fitting area of 4f<sub>7/2</sub> and 4f<sub>5/2</sub> in Au(I)/Au(0) by XPS analysis.

| Samples                                                                                           | Fitting area ratio of Au(I): Au(0) | Atomic ratio of Au(I): Au(0) |
|---------------------------------------------------------------------------------------------------|------------------------------------|------------------------------|
| Au <sub>144</sub> (PA) <sub>60</sub>                                                              | 13125.32: 52320.83                 | 1: 3.9                       |
| Au <sub>144</sub> (C≡CAr) <sub>60</sub><br>(Ar= 2-F-C <sub>6</sub> H <sub>4</sub> -) <sup>7</sup> | -                                  | 1: 3.8                       |

**Table S3.** The crystal structure parameter for (PA)<sub>4</sub>.

|                                   |                                                               |                  |  |
|-----------------------------------|---------------------------------------------------------------|------------------|--|
| Identification code               | (PA) <sub>4</sub>                                             |                  |  |
| Empirical formula                 | C <sub>32</sub> H <sub>20</sub>                               |                  |  |
| Formula weight                    | 404.48                                                        |                  |  |
| Temperature/K                     | 149.99(10)                                                    |                  |  |
| Crystal system                    | monoclinic                                                    |                  |  |
| Space group                       | P2 <sub>1</sub> /c                                            |                  |  |
| Unit cell dimensions              | a = 6.13910(10) Å                                             | α = 90°          |  |
|                                   | b = 15.1547(2) Å                                              | β = 94.6300(10)° |  |
|                                   | c = 11.9272(2) Å                                              | γ = 90°          |  |
| Volume                            | 1106.04(3) Å <sup>3</sup>                                     |                  |  |
| Z                                 | 2                                                             |                  |  |
| Density (calculated)              | 1.215 g/cm <sup>3</sup>                                       |                  |  |
| Absorption coefficient            | 0.523mm <sup>-1</sup>                                         |                  |  |
| F(000)                            | 424.0                                                         |                  |  |
| Crystal size                      | 0.25 × 0.15 × 0.12 mm <sup>3</sup>                            |                  |  |
| Radiation                         | CuK <sub>α</sub> (λ = 1.54184)                                |                  |  |
| 2θ range for data collection      | 9.456 to 146.176                                              |                  |  |
| Index range                       | -6 ≤ h ≤ 7, -18 ≤ k ≤ 13, -12 ≤ l ≤ 14                        |                  |  |
| Reflections collected             | 4204                                                          |                  |  |
| Independent reflections           | 2164 [R <sub>int</sub> = 0.0335, R <sub>sigma</sub> = 0.0377] |                  |  |
| Data / restraints / parameters    | 2164/0/145                                                    |                  |  |
| Goodness-of-fit on F <sup>2</sup> | 1.040                                                         |                  |  |
| Final R indexes [I>=2σ (I)]       | R <sub>1</sub> = 0.0558, wR <sub>2</sub> = 0.1413             |                  |  |
| R indices (all data)              | R <sub>1</sub> = 0.0594, wR <sub>2</sub> = 0.1479             |                  |  |
| Largest diff. peak/hole           | 0.29/-0.41 e Å <sup>-3</sup>                                  |                  |  |

## References

1. T. Higaki, M. Zhou, K. J. Lambright, K. Kirschbaum, M. Y. Sfeir and R. Jin, *J. Am. Chem. Soc.*, 2018, **140**, 5691-5695.
2. H. Qian and R. Jin, *Nano Lett.*, 2009, **9**, 4083-4087.
3. C. Version, *Santa Clara, CA, USA*, 2011.
4. O. V. Dolomanov, L. J. Bourhis, R. J. Gildea, J. A. Howard and H. Puschmann, *J Appl. Crystallogr.*, 2009, **42**, 339-341.
5. T. N. Hooper, C. P. Butts, M. Green, M. F. Haddow, J. E. McGrady and C. A. Russell, *Chem. Eur. J.*, 2009, **15**, 12196-12200.
6. X. K. Wan, Q. Tang, S. F. Yuan, D. E. Jiang and Q. M. Wang, *J. Am. Chem. Soc.*, 2015, **137**, 652-655.
7. Z. Lei, J. J. Li, X. K. Wan, W. H. Zhang and Q. M. Wang, *Angew. Chem., Int. Ed.*, 2018, **57**, 8639-8643.
